# Supplementary material for: Controlled reduction of aromaticity of alkylated polyaromatic compounds by selective oxidation using H2WO4, H3PO4 and H2O2: a route for upgrading heavy oil fractions
Source: Royal Society of Chemistry journal article supplement (doi:10.1039/d1nj01986d), 2021-01-01

## Supporting Information

### **Controlled reduction of aromaticity of alkylated polyaromatic compounds by selective oxidation using H<sub>2</sub>WO<sub>4</sub>, H<sub>3</sub>PO<sub>4</sub> and H<sub>2</sub>O<sub>2</sub>: A route for upgrading heavy oil fractions**

Ewa Nowicka,<sup>a\*</sup> Meenakshisundaram Sankar,<sup>a</sup> Robert L. Jenkins,<sup>a</sup> David W. Knight,<sup>a</sup> David J. Willock,<sup>a</sup> Graham J. Hutchings,<sup>a</sup> Manuel Francisco<sup>b†</sup> and Stuart H. Taylor<sup>a\*</sup>

<sup>a</sup> Cardiff Catalysis Institute, School of Chemistry, Cardiff University, Main Building, Park Place, Cardiff, CF10 3AT, UK.

<sup>b</sup> ExxonMobil Research & Engineering Company, 1545 Route 22 East, Annandale, New Jersey 08801, USA.

**Figure S1:**  $^1\text{H}$  NMR (500MHz,  $\text{CDCl}_3$ ) of *a*) 2-octadecylpyrene (**9**) and *b*) the oxidation products obtained from 2-octadecylpyrene, with marked groups of protons A and D used for calculation of % of preserved aliphatic protons.

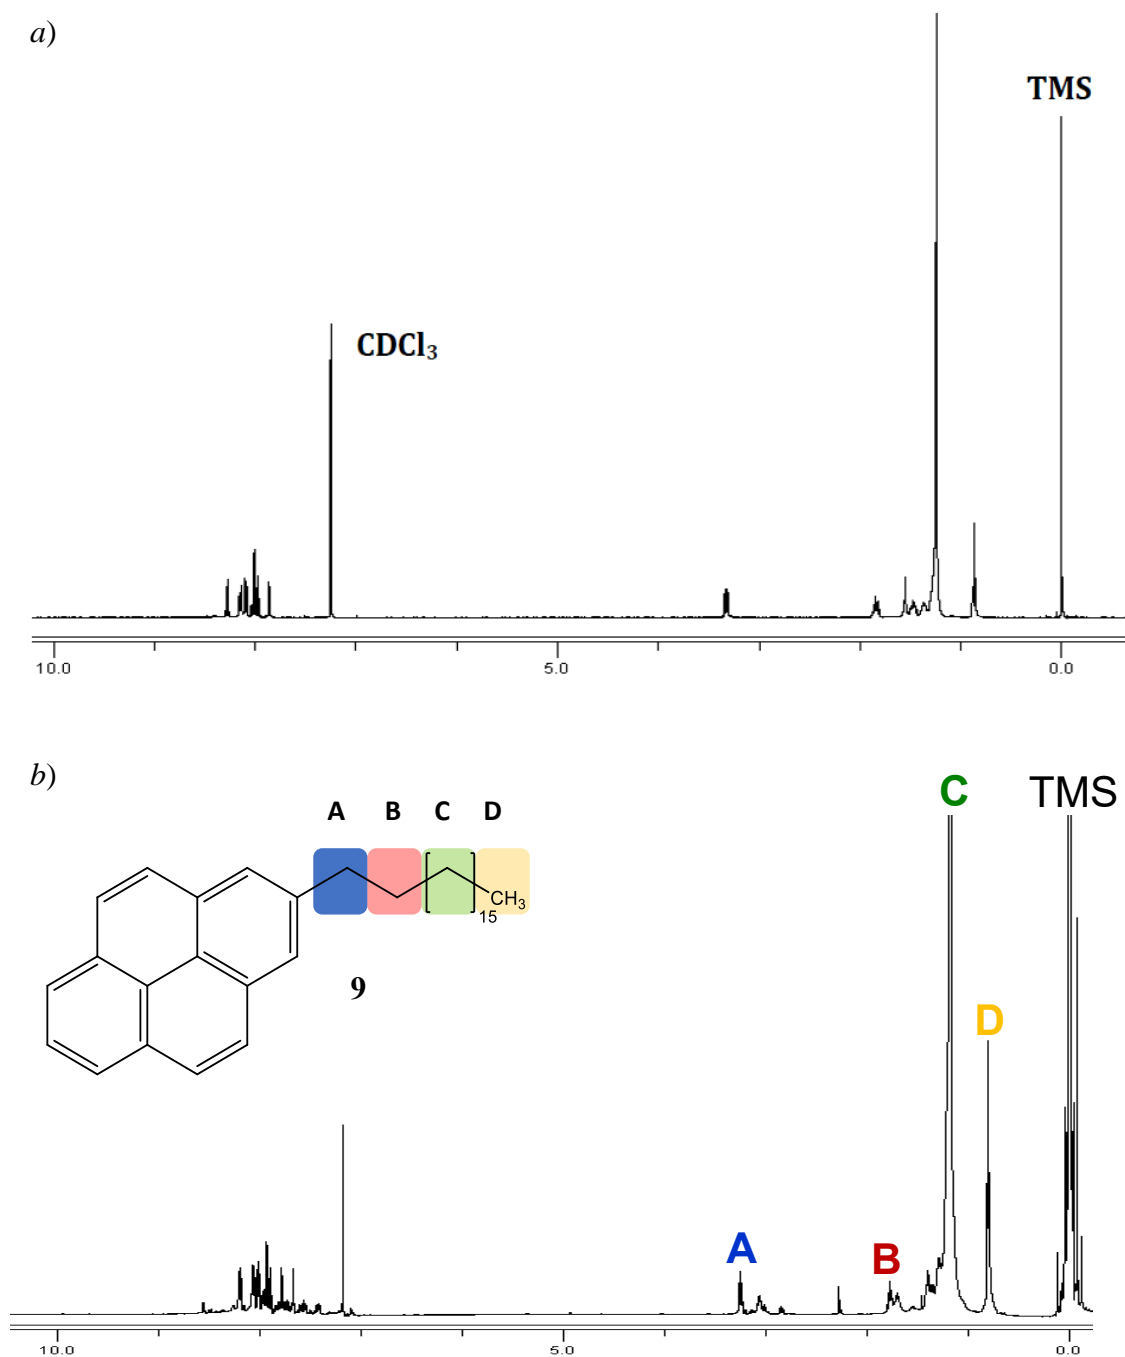

**Figure S2.** GC-MS analysis of 2-ethylnaphthalene oxidation products in toluene (2-ethylnaphthalene,  $R_t$ = 19.35 mins; acetophenone,  $R_t$ =22.63 mins).

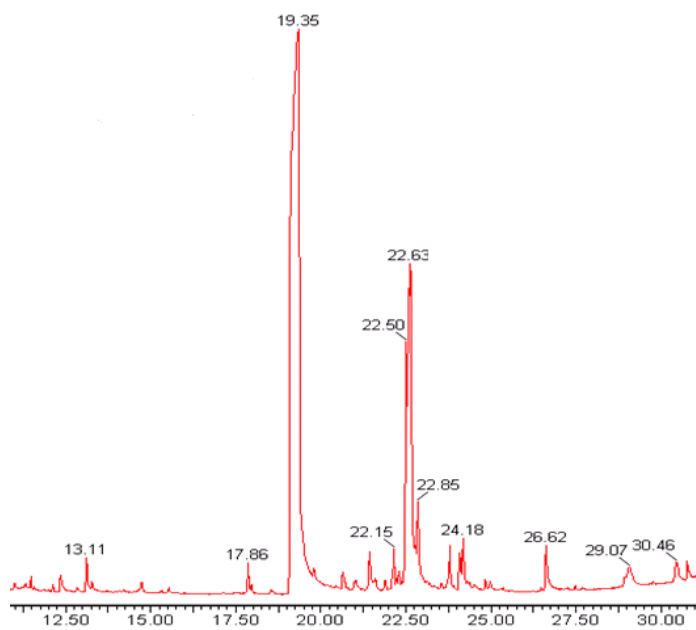

**Figure S3.** GC-MS analysis of 2-ethylnaphthalene oxidation products in chlorobenzene (2-ethylnaphthalene, Rt= 19.30 mins; 5-ethyl phthalic acid, Rt=21.48 mins; acetophenone, Rt=22.65 mins; Rt=23.80 mins unidentified product).

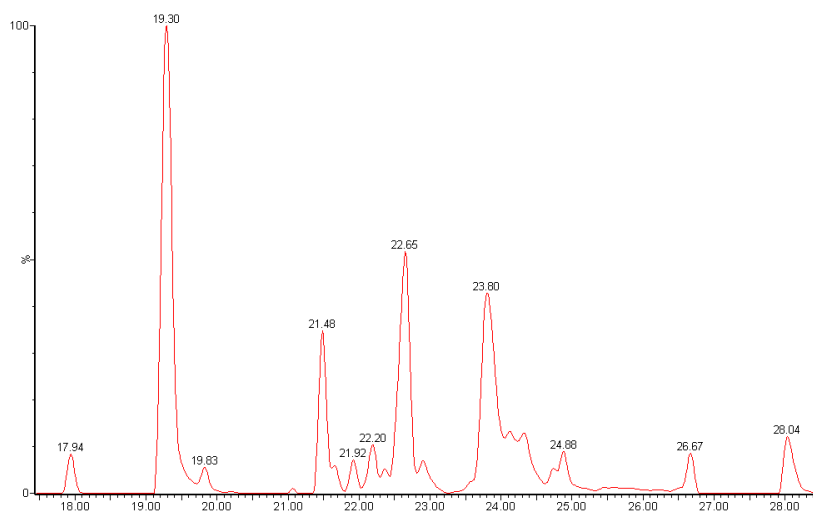

**Figure S4.** GC-MS analysis of 2-ethylnaphthalene oxidation products in propionitrile (2-ethylnaphthalene,  $R_t=19.64$  mins; naphthalene-2-yl-ethanol,  $R_t=22.51$  mins; several column bleeding and unidentified products).

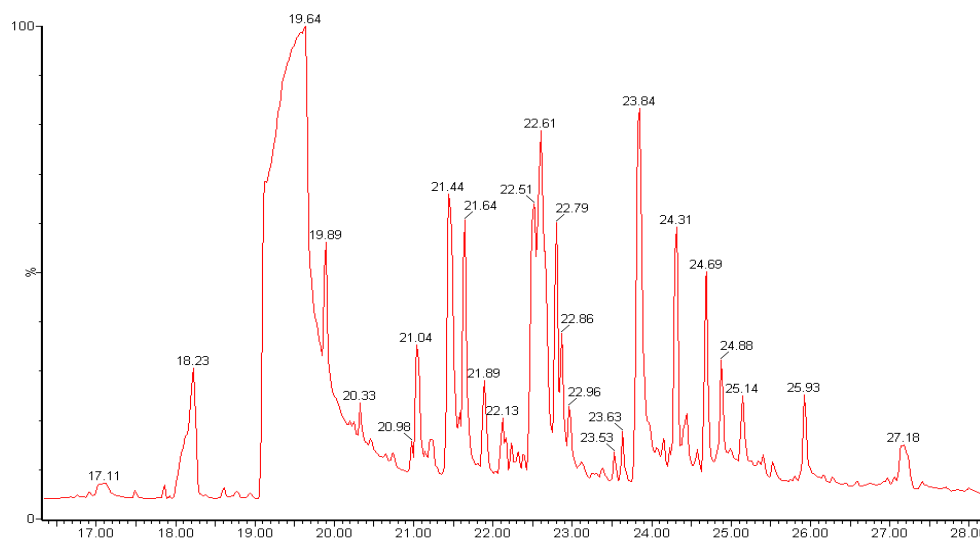

**Figure S5.** GC-MS analysis of 2-ethylnaphthalene oxidation products in acetonitrile.

(2-ethylnaphthalene  $R_t=19.27$  mins, 5-ethyl phthalic acid,  $R_t=21.51$ mins; 6-ethylnaphthalene-1,4-dione,  $R_t=22.67$  mins; 6-ethyl-2-hydroxynaphthalene-1,4-dione,  $R_t=23.89$  mins)

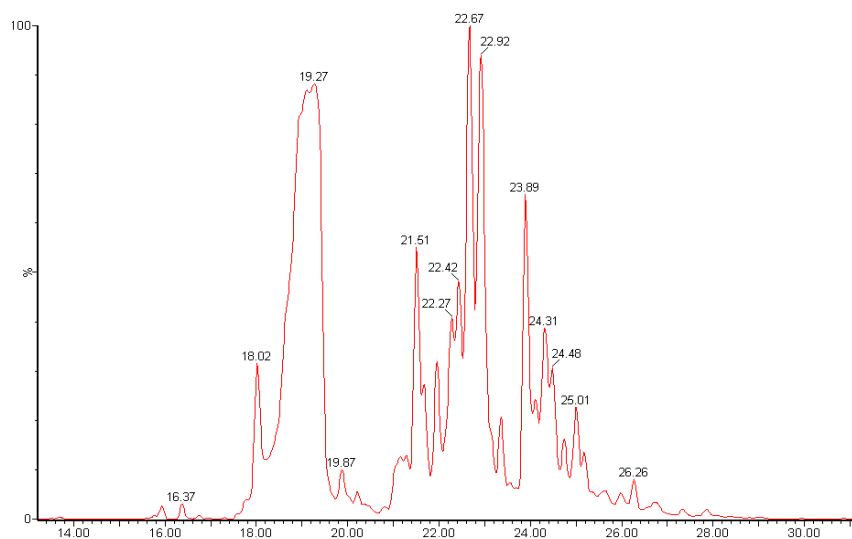

**Figure S6:** Comparison of  $^{13}\text{C}$  NMR spectra of 2-acetonaphthone standard (top) and reaction mixture from 2-ethylnaphthalene oxidation (bottom)

*Reaction Conditions: Substrate 18.8 mmol,  $\text{H}_2\text{WO}_4$  0.153g (0.614mmol),  $\text{H}_2\text{O}_2$  35% 12 ml, Aliquat 336 0.24 ml,  $\text{H}_3\text{PO}_4$  10% 0.14 ml,  $\text{CH}_3\text{CN}$  8 ml,  $T=65^\circ\text{C}$ ,  $t=20$  h*

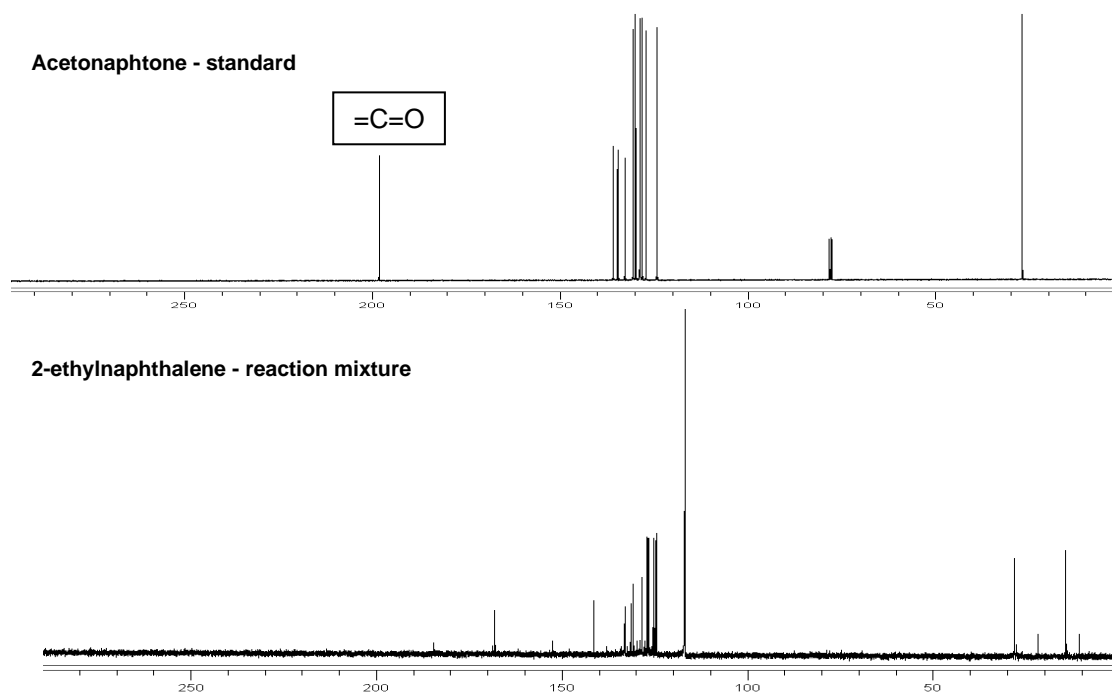

**Figure S7:** Structures of a) phenanthrene and b) pyrene showing standard atom numberings used in this manuscript.

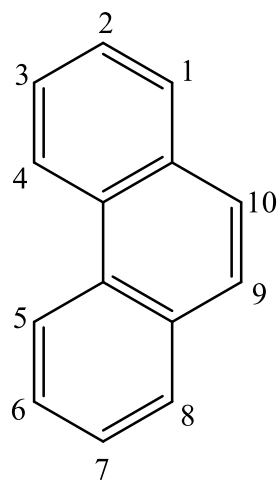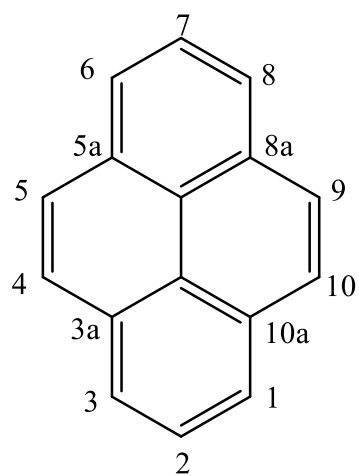



**Figure S8:** IR analysis of 2-octadecylpyrene oxidation products (organic layer)

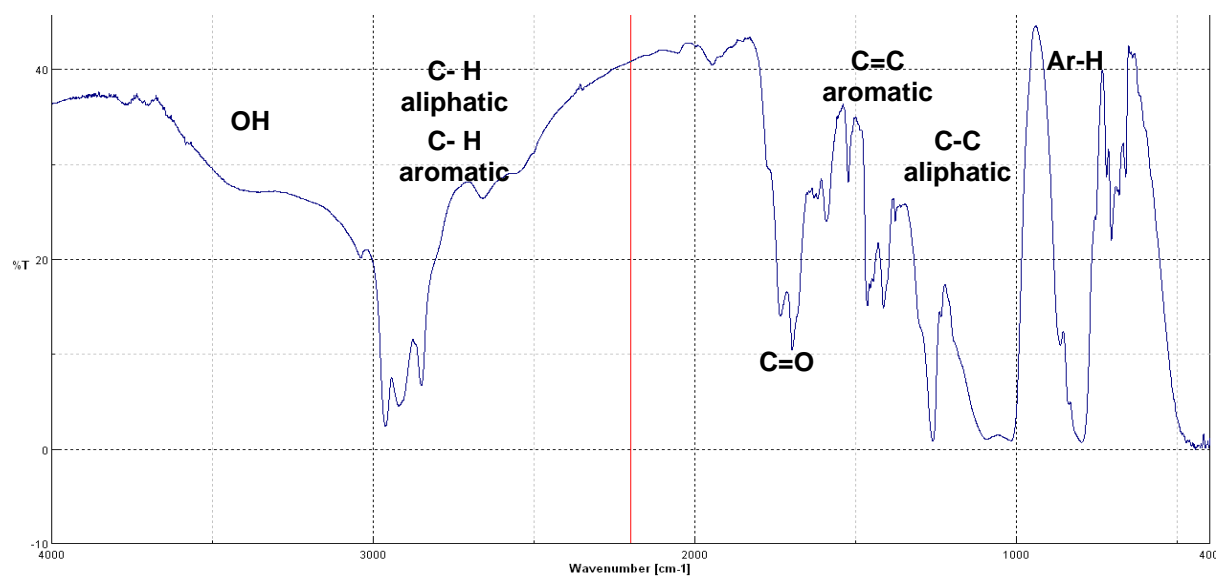

**Figure S9:** MS analysis of 2-octadecylpyrene oxidation products with strong signal  $m/z$  581.31.

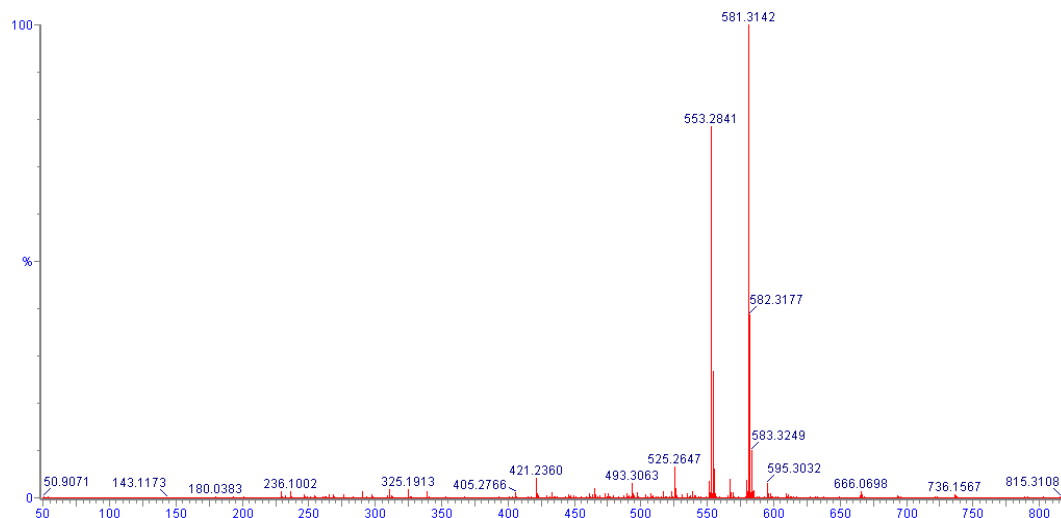

**Figure S10:** MS analysis of 9-octadecylphenanthrene oxidation with strong signal  $m/z$  462.34

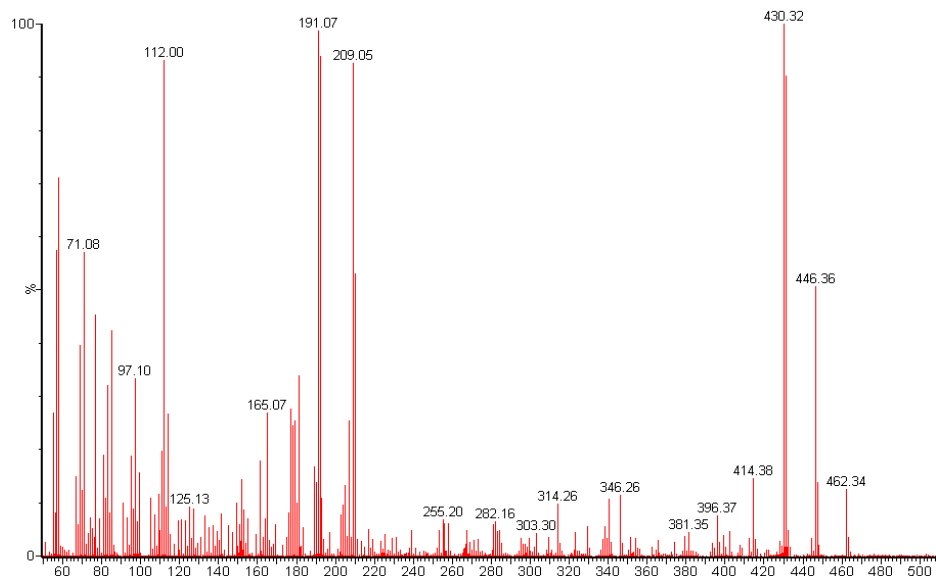

**Figure S11:**  $^1\text{H}$  NMR analysis of 9-octadecylphenanthrene oxidation products (500MHz, 1% TMS in  $\text{CDCl}_3$ ).

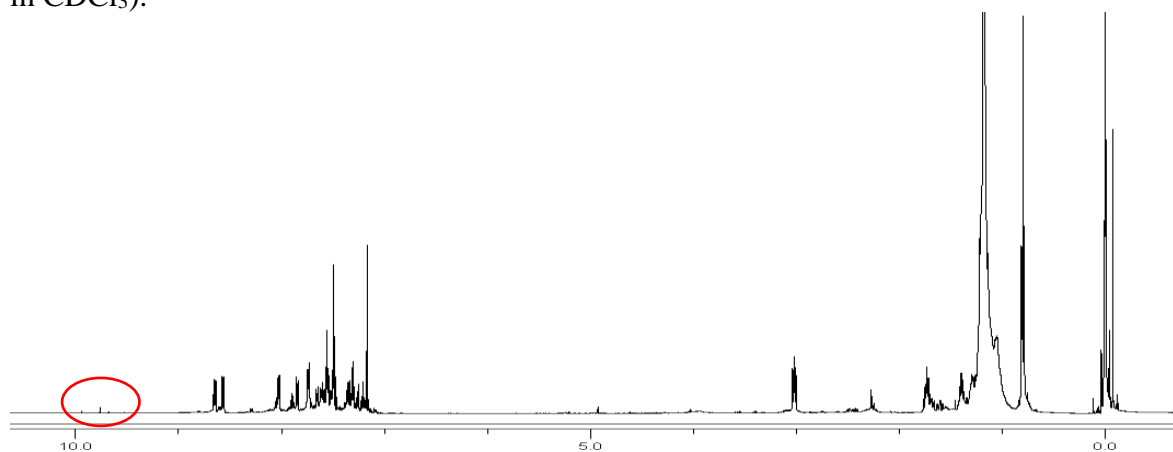

Supplement: d1nj01986d1.pdf [file d1nj01986d1.pdf]
